# Supplementary material
Source: bioRxiv or medRxiv preprint supplement (https://www.biorxiv.org/highwire/filestream/15457/field_highwire_adjunct_files/0/056283-1.pdf)
Supplement: Supplementary file [file 056283-1.pdf]

## **Supplementary materials for: Large-scale *trans*-eQTLs affect hundreds of transcripts and mediate patterns of transcriptional co-regulation**

Boel Brynedal, JinMyung Choi, Towfique Raj, Robert Bjornson, Barbara E Stranger, Benjamin M Neale, Benjamin F Voight, and Chris Cotsapas

### **Table of contents**

#### **Supplementary text**

- \* Optimal lambda selection
- \* Covariance shrinkage effects on CPMA

#### **Supplementary figures**

- Figure S1: Flow of analysis.
- Figure S2: Bimodal shape prior to filtering gene expression data. IQR.
- Figure S2: Bimodal shape prior to filtering gene expression data. Intensity.
- Figure S4: Lambda box plots
- Figure S5: QQplots of meta CPMA empirical p-values (all and clumped)
- Figure S6: Correlation between target overlap and target directionality overlap p-values
- Figure S7: meta e-QTL p-value histograms and violin plots of 6 *trans*-eQTLs

#### **Supplementary Tables**

- Table S1. Wilcoxon test between populations of CPMA statistics
- Table S2. GO enrichments (8 tables of top 10 GOs)

## Supplementary text

### *Finding the optimal number of principal components to include*

We estimated the optimal number of principal components to include for each population. Using the entire set of genes in this iterative analysis is computationally prohibitive, so we chose a subset of 100 random genes. 50 of these genes were randomly selected among those within the top 95% of genomic inflation factor  $\lambda_{gc}$  [[ref]] to ensure that we were able to correct most of the extreme biases. In each population, we iteratively included 1 to 30 principal components as covariates for each gene in a linear regression. The distributions of  $\lambda_{gc}$  per number of principal components included is seen in Figure S3. The smallest number of principal components required to correct for population stratification was two for YRI, ten for LWK and 20 for MKK.

### *Shrinkage of covariance matrices*

We have estimated the covariance between the eQTL z-score vectors of 9,085 genes based on 737,867 eQTL z-scores using the `cov` function in R (scaling and centering each vector) which uses maximum likelihood estimation (?!). Inferring large covariance matrices from sparse genomic data can be problematic, and we therefore evaluated whether a shrinkage approach would produce more well conditioned covariance matrices. For this testing we utilized a subset of the MKK data; 10% of the genes (900) and 10% of the eQTL z-values (73786) per gene. We estimated the covariance of this subset using the `cov` function in R, and then shrunk the covariance matrix using the `cov.shrink` function from the `corpcor` package (v. 1.6.8). Both covariance matrices had full rank (900), but the shrunk covariance matrix has a larger condition value (1253) than the originally estimated covariance matrix (1442). We therefore selected not to shrink our covariance matrices.

The three full size covariance matrices are all positive definite with full rank.

Supplementary Figure 1. Flow of analysis.

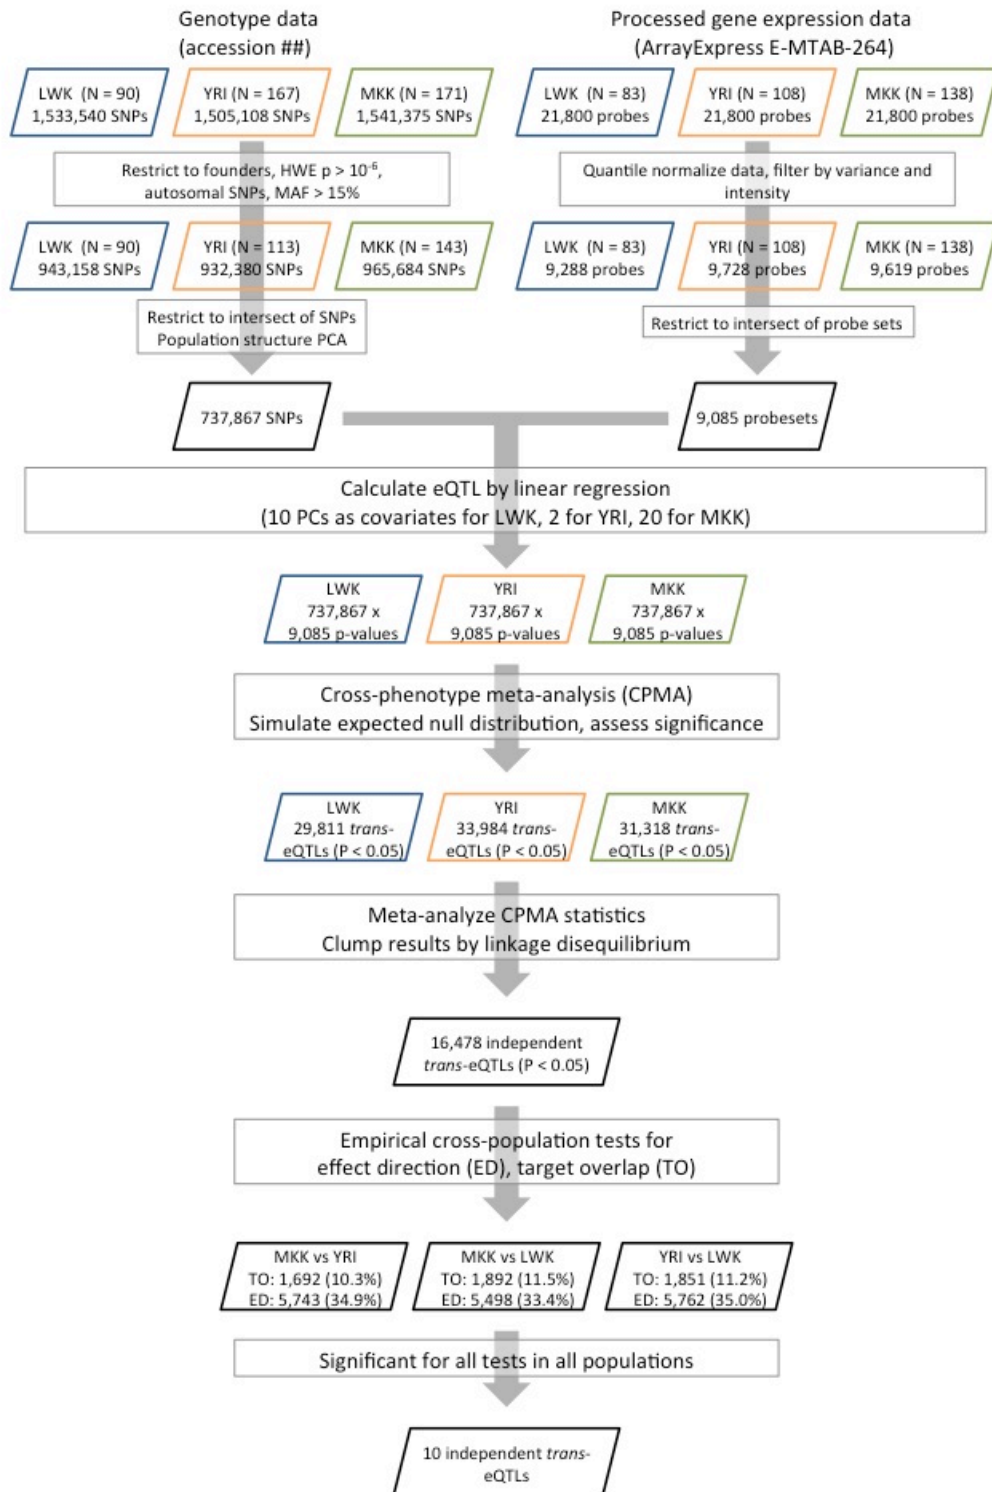

Hapmap eQTL data

Cross-phenotype meta-analysis

Supplementary Figure 2. Gene expression data filtering based on interquartile range. We used mixture modeling to select the probe sets which were at least 80% probable to belong to the higher distribution of IQR. Histogram across all genes before (left panel) and after (right panel) filtering.

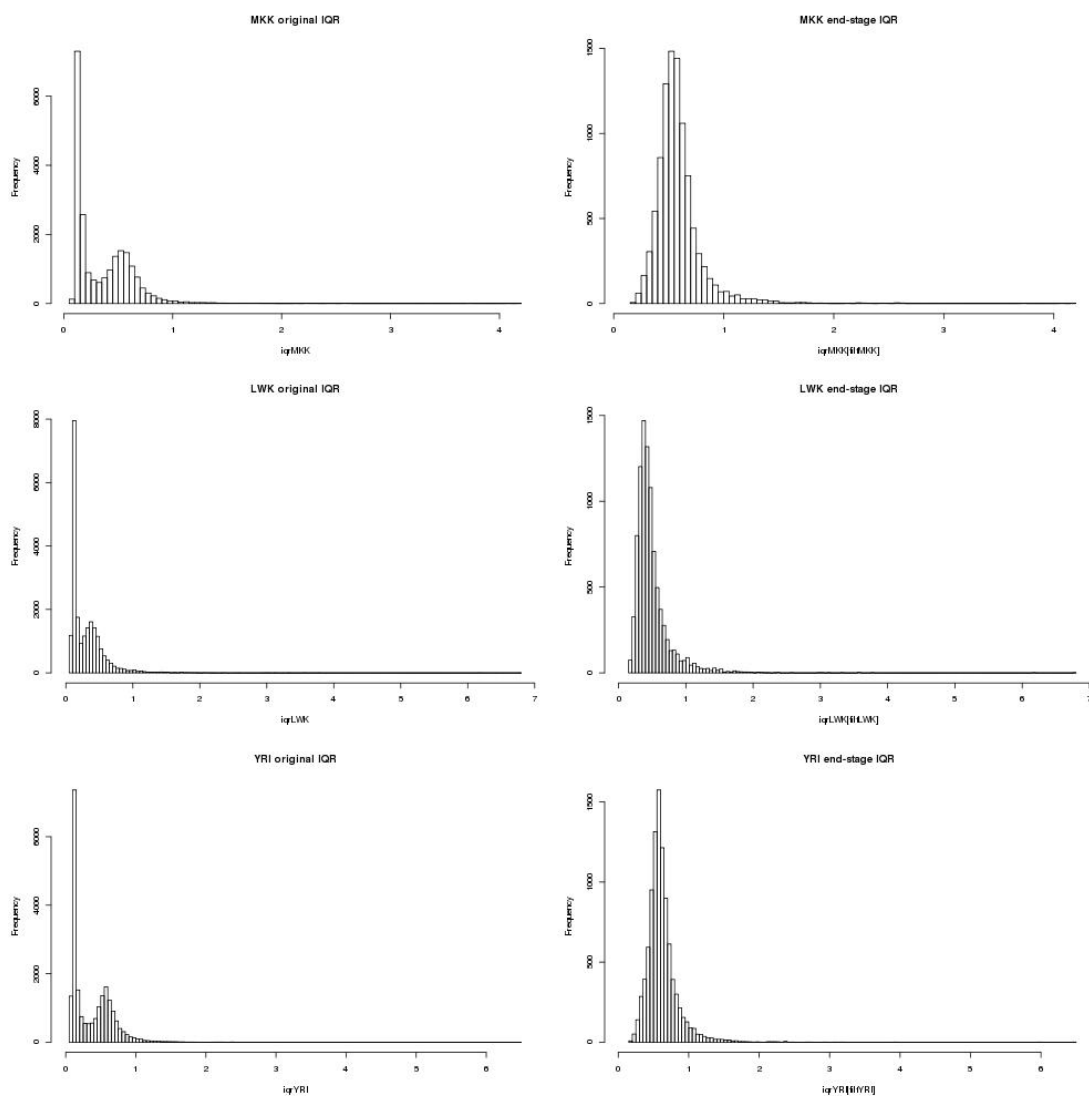

Supplementary Figure 3. Gene expression data filtering based on mean intensity. We used mixture modeling to select the probe sets which were at least 80% probable to belong to the higher distribution of mean intensity. Histogram across all genes before (left panel) and after (right panel) filtering.

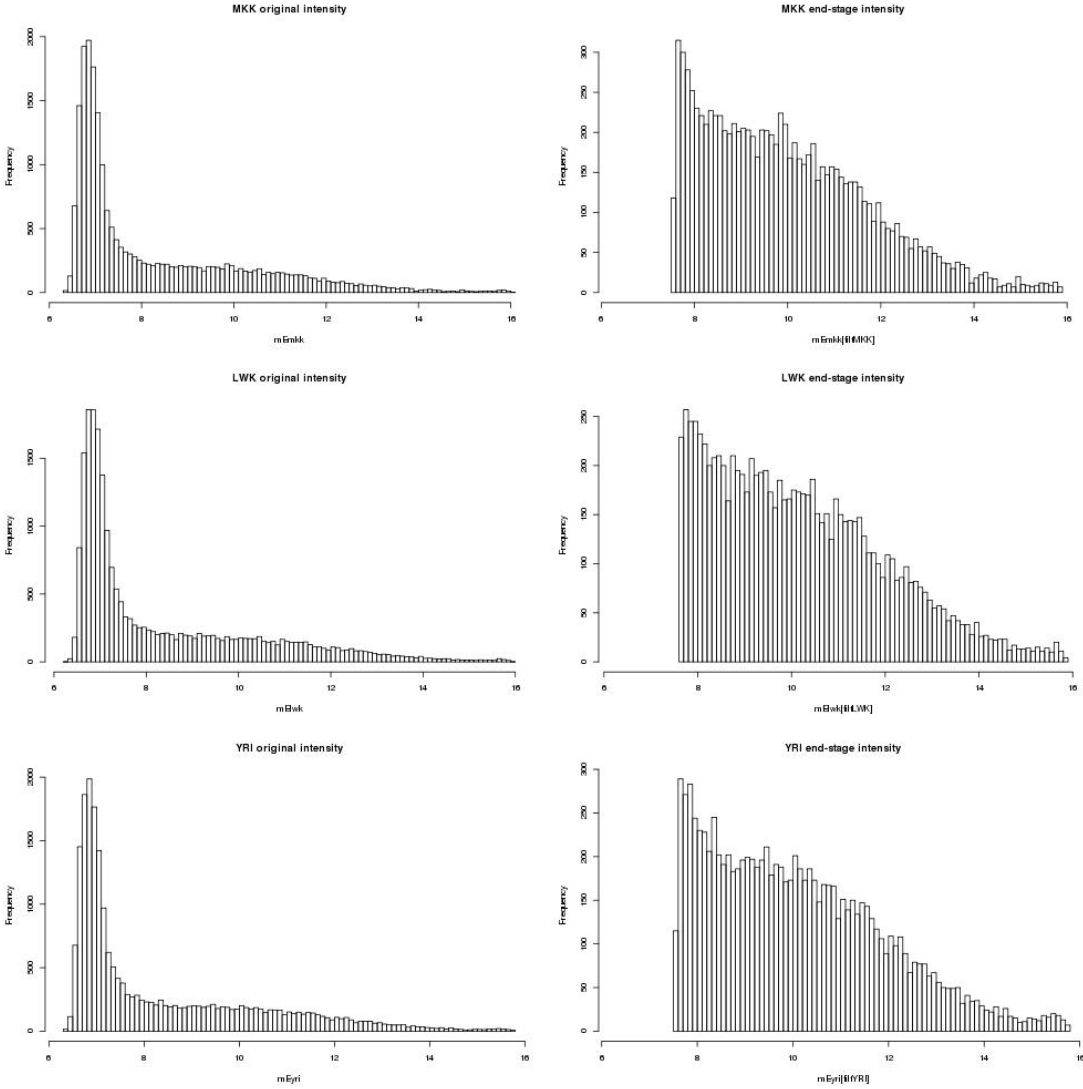

Supplementary Figure 4. Lambda boxplots. Boxplots of lambda genetic inflation factor lambda for 50 random genes (left panel) and 50 genes among those within 95 percentile of lambda (right panel) for MKK (upper), LWK (middle) and YRI (lower). Each boxplot is based on linear regression analysis of the 50 genes across 737,867 autosomal SNPs.

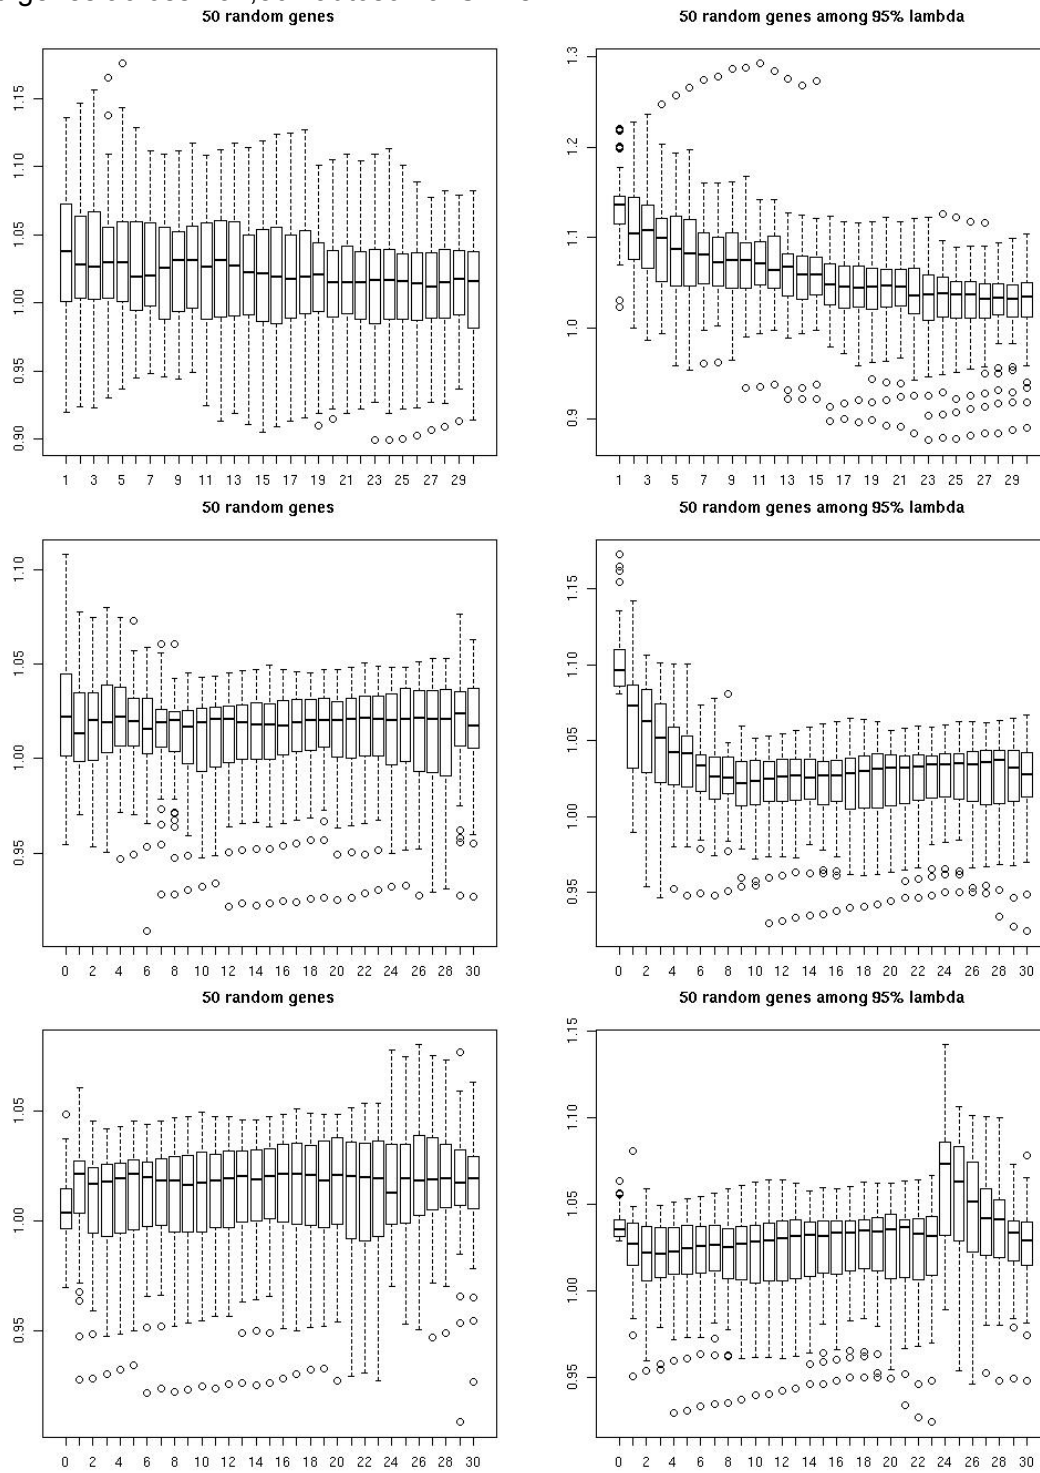

Supplementary Figure 5. CPMA p-values. Quantile quantile plot of the empirical p-values of CPMA after meta analysis of the three separate populations (YRI, MKK, LWK).

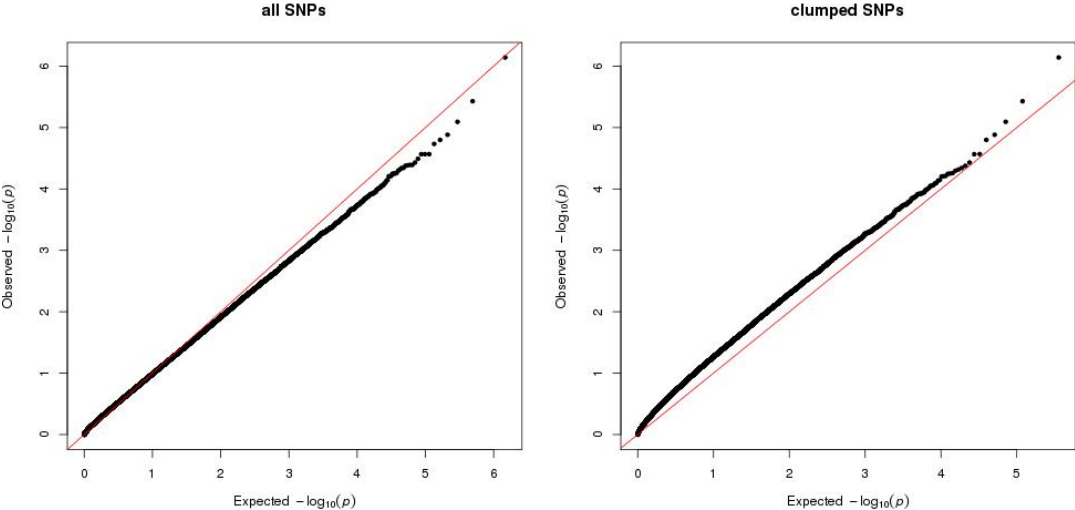

Supplementary Figure 6. The correlation between target overlap p-values and target overlap directionality p-values. All correlation coefficients are highly significant ( $p < 2.2e-16$ ) and equal 0.35 in YRI vs. LWK, 0.37 for YRI vs. MKK and 0.25 for LWK vs. MKK.

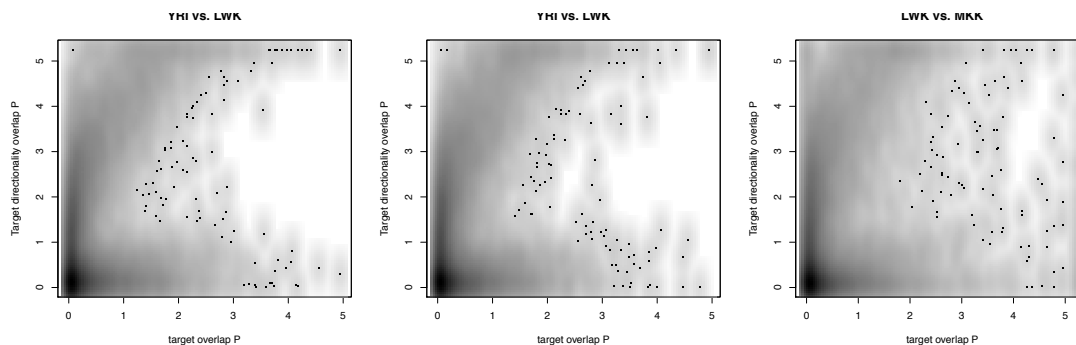



Supplementary Figure 7. Plots for six trans-eQTLs. Histogram of meta-eQTL p-values (left). For each population we selected all common targets with either positive or negative beta coefficients from linear regression, and plot their beta coefficients from the other two populations (right).

A. rs7694213

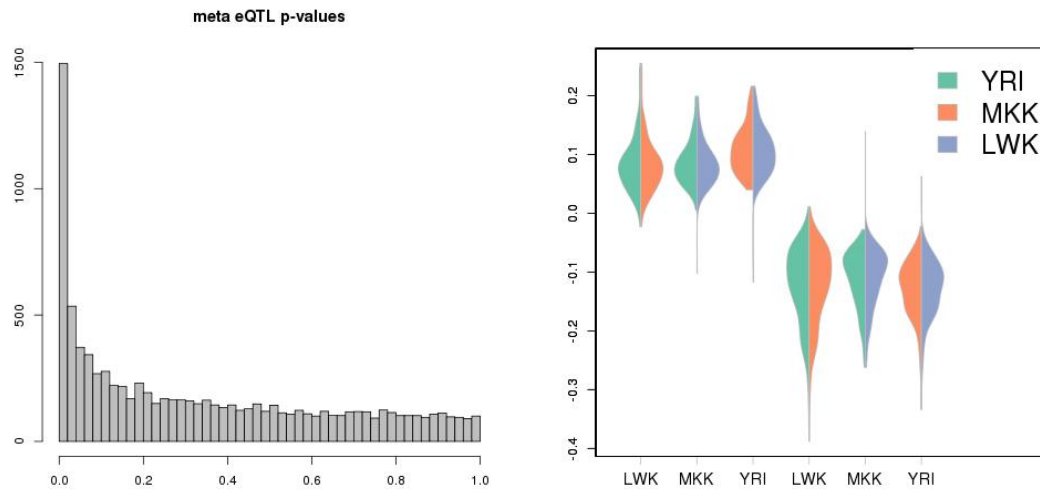

B. rs9406332

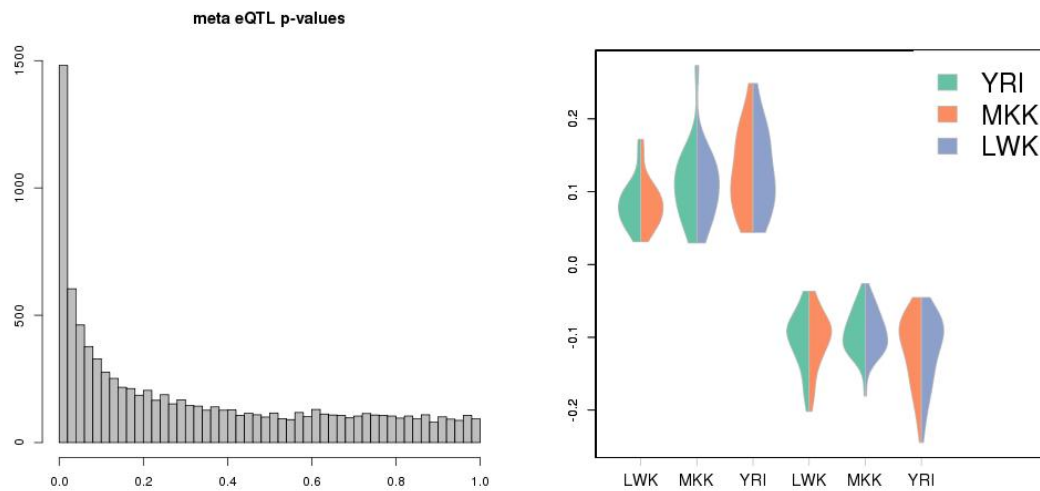

C. rs10107976

meta eQTL p-values

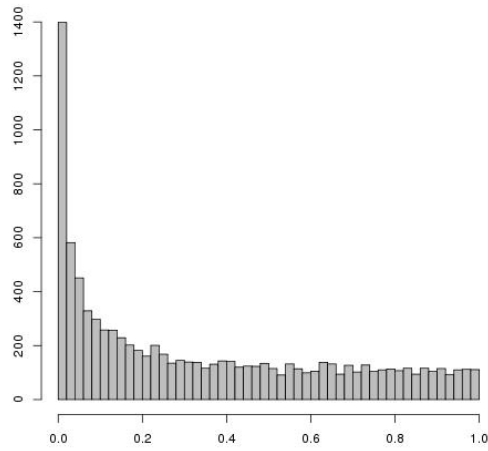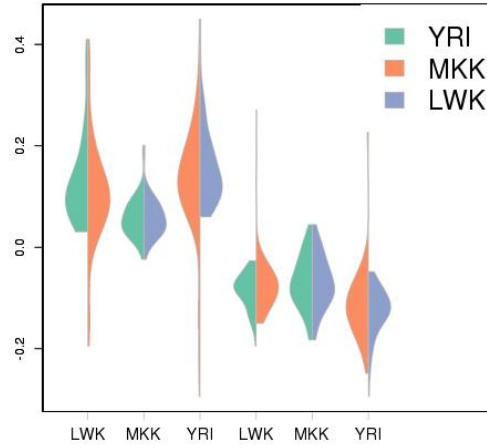

D. rs4773419

meta eQTL p-values

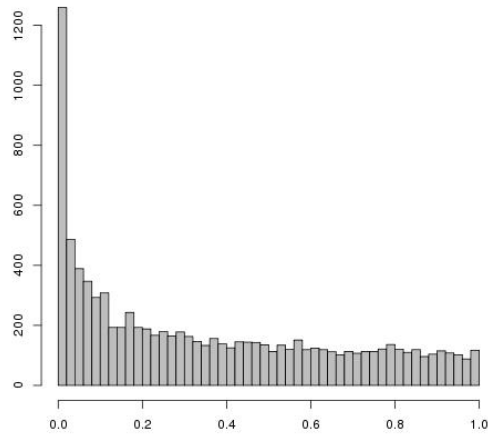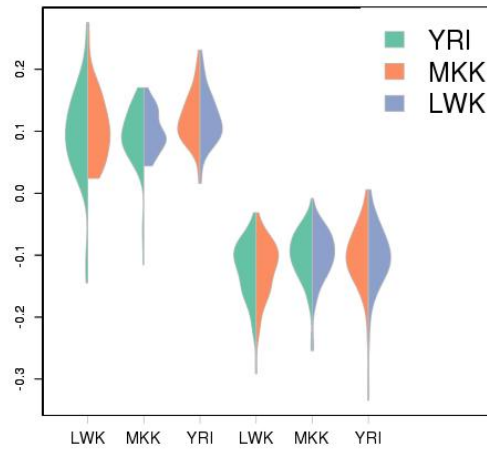

E. rs11621120

meta eQTL p-values

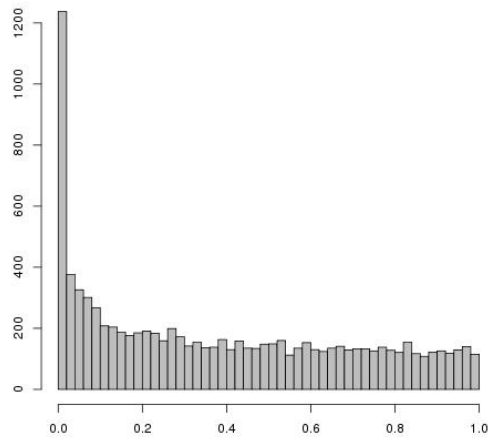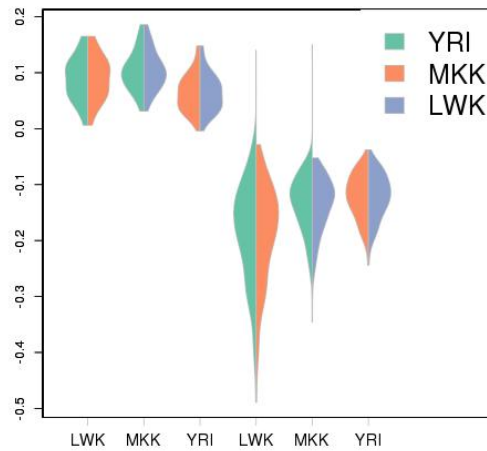

F. rs7281608

meta eQTL p-values

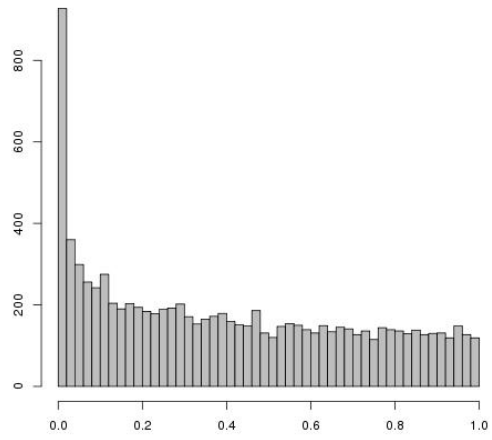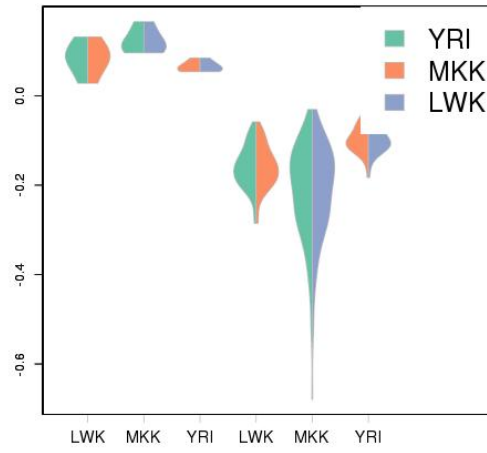

Supplementary Table 1. **CPMA statistics are consistent across populations at different alpha levels, indicating the presence of true *trans*-eQTLs.** We observe that variants with stronger CPMA statistics in MKK also have stronger statistics in LWK and YRI via Wilcoxon rank tests.

| alpha | YRI     | LWK     |
|-------|---------|---------|
| 0.5   | 1.4E-10 | 2.2E-05 |
| 0.4   | 4.4E-13 | 2.9E-06 |
| 0.3   | 3.7E-13 | 3.5E-05 |
| 0.2   | 3.0E-10 | 2.1E-04 |
| 0.1   | 6.0E-06 | 1.3E-02 |
| 0.05  | 1.10E-3 | 1.7E-02 |
| 0.01  | 1.90E-2 | 0.26    |

Supplementary Table 2. Gene ontology enrichments among *trans*-eQTL target sets. The analysis was adjusted for the hierarchical structure of gene ontology annotations, restricted to biological process gene sets of size 10 or above.

A. rs7694213 target enrichments (top 10 of 184 with  $p \leq 0.05$ ).

| GOBPID     | P       | OR  | ExpCount | Count | Size | Term                                                |
|------------|---------|-----|----------|-------|------|-----------------------------------------------------|
| GO:0034660 | 6.6E-04 | 2.3 | 11.1     | 23    | 246  | ncRNA metabolic process                             |
| GO:0034724 | 8.5E-04 | 6.5 | 1.2      | 6     | 26   | DNA replication-independent nucleosome organization |
| GO:0006396 | 1.0E-03 | 1.9 | 18.8     | 33    | 426  | RNA processing                                      |
| GO:0022613 | 1.0E-03 | 2.3 | 9.4      | 20    | 208  | ribonucleoprotein complex biogenesis                |
| GO:0006364 | 1.1E-03 | 3.4 | 3.7      | 11    | 83   | rRNA processing                                     |
| GO:0034080 | 1.2E-03 | 7.7 | 0.9      | 5     | 19   | CENP-A containing nucleosome assembly               |
| GO:0031123 | 3.9E-03 | 3.0 | 3.7      | 10    | 83   | RNA 3'-end processing                               |
| GO:0031440 | 4.8E-03 | 7.1 | 0.7      | 4     | 16   | regulation of mRNA 3'-end processing                |
| GO:0000375 | 5.0E-03 | 2.2 | 7.8      | 16    | 174  | RNA splicing, via transesterification reactions     |
| GO:0010256 | 5.7E-03 | 2.1 | 9.4      | 18    | 208  | endomembrane system organization                    |

B. rs6899963 target enrichments (top 10 of 50 with  $p \leq 0.05$ ).

| GOBPID     | P       | OR  | ExpCount | Count | Size | Term                                               |
|------------|---------|-----|----------|-------|------|----------------------------------------------------|
| GO:0007088 | 2.1E-05 | 4.7 | 3.3      | 13    | 69   | regulation of mitosis                              |
| GO:0051302 | 4.2E-05 | 3.5 | 5.7      | 17    | 117  | regulation of cell division                        |
| GO:1901564 | 4.7E-05 | 1.7 | 57.1     | 85    | 1179 | organonitrogen compound metabolic process          |
| GO:1901988 | 8.5E-05 | 3.0 | 7.2      | 19    | 148  | negative regulation of cell cycle phase transition |

---

|            |         |     |      |    |     |                                                                                                |
|------------|---------|-----|------|----|-----|------------------------------------------------------------------------------------------------|
| GO:0006281 | 1.2E-04 | 2.4 | 12.5 | 27 | 260 | DNA repair                                                                                     |
| GO:0000278 | 1.6E-04 | 1.9 | 26.8 | 46 | 565 | mitotic cell cycle                                                                             |
| GO:0009141 | 2.1E-04 | 1.8 | 30.2 | 50 | 624 | nucleoside triphosphate metabolic process                                                      |
| GO:0009205 | 2.4E-04 | 1.8 | 29.6 | 49 | 611 | purine ribonucleoside triphosphate metabolic process                                           |
| GO:0009203 | 2.7E-04 | 1.9 | 25.8 | 44 | 533 | ribonucleoside triphosphate catabolic process                                                  |
| GO:0031145 | 2.8E-04 | 4.0 | 3.2  | 11 | 66  | anaphase-promoting complex-dependent proteasomal ubiquitin-dependent protein catabolic process |

---

C. rs9406332 target enrichments (top 10 of 20 with  $p \leq 0.05$ ).

| GOBPID     | P       | OR   | ExpCount | Count | Size | Term                                                                                                |
|------------|---------|------|----------|-------|------|-----------------------------------------------------------------------------------------------------|
| GO:0006336 | 6.9E-05 | 21.9 | 0.2      | 4     | 26   | DNA replication-independent nucleosome assembly                                                     |
| GO:0031497 | 1.5E-03 | 9.1  | 0.5      | 4     | 57   | chromatin assembly                                                                                  |
| GO:0065004 | 3.2E-03 | 7.3  | 0.6      | 4     | 70   | protein-DNA complex assembly                                                                        |
| GO:0070584 | 5.5E-03 | 21.2 | 0.1      | 2     | 13   | mitochondrion morphogenesis                                                                         |
| GO:0044085 | 5.6E-03 | 2.3  | 9.0      | 17    | 1024 | cellular component biogenesis                                                                       |
| GO:0006461 | 8.1E-03 | 2.6  | 4.9      | 11    | 556  | protein complex assembly                                                                            |
| GO:0006401 | 8.6E-03 | 4.3  | 1.3      | 5     | 145  | RNA catabolic process                                                                               |
| GO:0043486 | 1.6E-02 | 11.7 | 0.2      | 2     | 22   | histone exchange                                                                                    |
| GO:0015931 | 1.8E-02 | 4.3  | 1.0      | 4     | 115  | nucleobase-containing compound transport                                                            |
| GO:0043928 | 1.8E-02 | 10.6 | 0.2      | 2     | 24   | exonucleolytic nuclear-transcribed mRNA catabolic process involved in deadenylation-dependent decay |

D. rs10107976 targets enrichments (top 10 of 50 with  $p \leq 0.05$ ).

| GOBPID     | P       | OR   | ExpCount | Count | Size | Term                                                 |
|------------|---------|------|----------|-------|------|------------------------------------------------------|
| GO:0043631 | 2.4E-03 | 13.0 | 0.3      | 3     | 20   | RNA polyadenylation                                  |
| GO:0000289 | 5.8E-03 | 9.2  | 0.4      | 3     | 27   | nuclear-transcribed mRNA poly(A) tail shortening     |
| GO:0044265 | 6.0E-03 | 2.3  | 7.4      | 15    | 536  | cellular macromolecule catabolic process             |
| GO:0006402 | 7.3E-03 | 3.8  | 1.7      | 6     | 125  | mRNA catabolic process                               |
| GO:0019471 | 7.8E-03 | 18.3 | 0.1      | 2     | 10   | 4-hydroxyproline metabolic process                   |
| GO:0006397 | 9.0E-03 | 2.6  | 4.2      | 10    | 306  | mRNA processing                                      |
| GO:0050873 | 1.1E-02 | 14.6 | 0.2      | 2     | 12   | brown fat cell differentiation                       |
| GO:0009451 | 1.2E-02 | 4.9  | 0.9      | 4     | 65   | RNA modification                                     |
| GO:0006120 | 1.2E-02 | 6.9  | 0.5      | 3     | 35   | mitochondrial electron transport, NADH to ubiquinone |
| GO:0001568 | 1.4E-02 | 3.0  | 2.6      | 7     | 186  | blood vessel development                             |

E. rs4773419 target enrichments (top 10 of 68 with  $p \leq 0.05$ ).

| GOBPID     | P       | OR  | ExpCoun<br>t | Count | Size | Term                                                      |
|------------|---------|-----|--------------|-------|------|-----------------------------------------------------------|
| GO:0009889 | 2.5E-05 | 2.1 | 36.7         | 59    | 1834 | regulation of biosynthetic process                        |
| GO:0080090 | 2.6E-05 | 2.0 | 51.4         | 75    | 2567 | regulation of primary metabolic process                   |
| GO:0044260 | 6.5E-05 | 2.4 | 28.8         | 46    | 1718 | cellular macromolecule metabolic process                  |
| GO:0031323 | 7.3E-05 | 2.0 | 51.8         | 74    | 2587 | regulation of cellular metabolic process                  |
| GO:0051252 | 1.8E-04 | 2.0 | 33.0         | 52    | 1647 | regulation of RNA metabolic process                       |
| GO:0017148 | 3.2E-04 | 7.4 | 0.9          | 6     | 47   | negative regulation of translation                        |
| GO:0006355 | 3.6E-04 | 1.9 | 31.3         | 49    | 1561 | regulation of transcription, DNA-templated                |
| GO:0051171 | 3.6E-04 | 1.8 | 41.0         | 60    | 2047 | regulation of nitrogen compound metabolic process         |
| GO:0090304 | 4.1E-04 | 1.8 | 49.5         | 69    | 2473 | nucleic acid metabolic process                            |
| GO:2000112 | 1.9E-03 | 3.6 | 2.8          | 9     | 170  | regulation of cellular macromolecule biosynthetic process |

F. rs11621120 target enrichments (top 10 of 81 with  $p \leq 0.05$ ).

| GOBPID     | P       | OR   | ExpCount | Count | Size | Term                                                 |
|------------|---------|------|----------|-------|------|------------------------------------------------------|
| GO:1901888 | 1.0E-03 | 10.7 | 0.5      | 4     | 20   | regulation of cell junction assembly                 |
| GO:0046856 | 1.8E-03 | 15.9 | 0.3      | 3     | 11   | phosphatidylinositol dephosphorylation               |
| GO:0034330 | 3.8E-03 | 3.8  | 2.0      | 7     | 86   | cell junction organization                           |
| GO:0043647 | 5.5E-03 | 6.3  | 0.7      | 4     | 31   | inositol phosphate metabolic process                 |
| GO:0016072 | 6.6E-03 | 3.4  | 2.2      | 7     | 95   | rRNA metabolic process                               |
| GO:0030838 | 7.7E-03 | 5.7  | 0.8      | 4     | 34   | positive regulation of actin filament polymerization |
| GO:0045806 | 7.9E-03 | 8.5  | 0.4      | 3     | 18   | negative regulation of endocytosis                   |
| GO:0022607 | 1.0E-02 | 1.7  | 21.2     | 32    | 908  | cellular component assembly                          |
| GO:0061640 | 1.1E-02 | 7.5  | 0.5      | 3     | 20   | cytoskeleton-dependent cytokinesis                   |
| GO:0044085 | 1.1E-02 | 3.1  | 2.5      | 7     | 114  | cellular component biogenesis                        |

G. rs10520643 target enrichments (top 10 of 124 with  $p \leq 0.05$ ).

| GOBPID     | P       | OR  | ExpCount | Count | Size | Term                                                                                            |
|------------|---------|-----|----------|-------|------|-------------------------------------------------------------------------------------------------|
| GO:0016071 | 1.0E-08 | 2.2 | 43.4     | 81    | 437  | mRNA metabolic process                                                                          |
| GO:0046483 | 7.2E-07 | 1.5 | 318.9    | 379   | 3208 | heterocycle metabolic process                                                                   |
| GO:0006725 | 1.3E-06 | 1.5 | 318.3    | 377   | 3202 | cellular aromatic compound metabolic process                                                    |
| GO:0051436 | 1.6E-06 | 4.8 | 5.3      | 18    | 53   | negative regulation of ubiquitin-protein ligase activity involved in mitotic cell cycle         |
| GO:0006521 | 4.2E-06 | 5.3 | 4.1      | 15    | 41   | regulation of cellular amino acid metabolic process                                             |
| GO:0051437 | 5.4E-06 | 4.3 | 5.7      | 18    | 57   | positive regulation of ubiquitin-protein ligase activity involved in mitotic cell cycle         |
| GO:0034641 | 8.0E-06 | 1.4 | 314.9    | 368   | 3214 | cellular nitrogen compound metabolic process                                                    |
| GO:1901360 | 8.4E-06 | 1.4 | 326.3    | 380   | 3282 | organic cyclic compound metabolic process                                                       |
| GO:0002479 | 1.1E-05 | 4.5 | 4.9      | 16    | 49   | antigen processing and presentation of exogenous peptide antigen via MHC class I, TAP-dependent |
| GO:0051352 | 1.2E-05 | 4.0 | 6.0      | 18    | 60   | negative regulation of ligase activity                                                          |

H. rs7281608 target enrichments (top 10 of 37 with  $p \leq 0.05$ ).

| GOBPID     | P       | OR   | ExpCount | Count | Size | Term                                        |
|------------|---------|------|----------|-------|------|---------------------------------------------|
| GO:0045806 | 8.5E-04 | 19.3 | 0.2      | 3     | 18   | negative regulation of endocytosis          |
| GO:0010883 | 1.2E-03 | 17.0 | 0.2      | 3     | 20   | regulation of lipid storage                 |
| GO:0034622 | 1.4E-03 | 3.3  | 3.9      | 11    | 361  | cellular macromolecular complex assembly    |
| GO:0016358 | 1.9E-03 | 8.5  | 0.5      | 4     | 50   | dendrite development                        |
| GO:0090305 | 2.6E-03 | 4.8  | 1.4      | 6     | 131  | nucleic acid phosphodiester bond hydrolysis |
| GO:0046856 | 5.8E-03 | 21.2 | 0.1      | 2     | 11   | phosphatidylinositol dephosphorylation      |
| GO:0022613 | 6.5E-03 | 3.5  | 2.2      | 7     | 208  | ribonucleoprotein complex biogenesis        |
| GO:0051896 | 9.9E-03 | 7.4  | 0.4      | 3     | 42   | regulation of protein kinase B signaling    |



---

|                |             |      |     |   |     |                                                |
|----------------|-------------|------|-----|---|-----|------------------------------------------------|
| GO:004298<br>2 | 1.2E-<br>02 | 13.6 | 0.2 | 2 | 16  | amyloid precursor protein metabolic<br>process |
| GO:000639<br>7 | 1.6E-<br>02 | 2.7  | 3.3 | 8 | 306 | mRNA processing                                |

---
